# Supplementary material
Source: Springer Nature journal article supplement (https://www.springermedizin.de/resource/supplementary/13058_2005_1306_MOESM2_ESM.pdf/9698818)

**Figure 1b. Mammographic Density by Quartile of Total Hip Bone Mineral Density (BMD) in Participants who were not Recent Hormone Therapy Users**

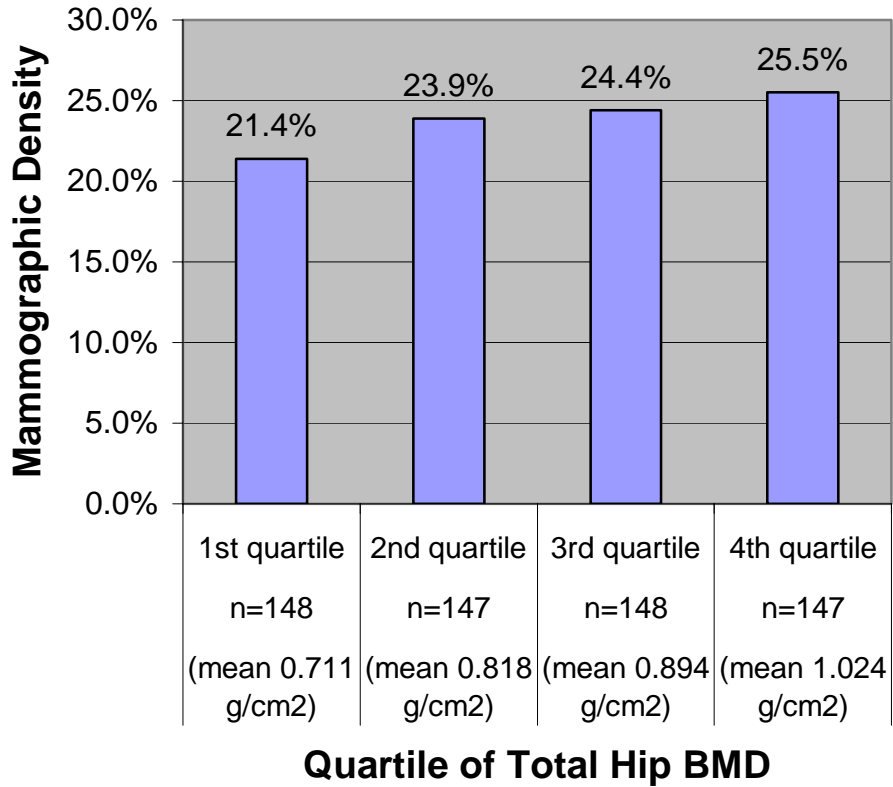

Supplement: MOESM2 [file 9698818]
